# Supplementary material for: Nanoporous carbons derived from MOFs as metal-free catalysts for selective aerobic oxidations
Source: Royal Society of Chemistry journal article supplement (doi:10.1039/c6ta00324a), 2016-01-01
Supplement: c6ta00324a1.pdf [file c6ta00324a1.pdf]

## Supporting Information

### **Nanoporous Carbons Derived from MOFs as Metal-Free Catalysts for Selective Aerobic Oxidations**

Xi Wang, Yingwei Li\*

School of Chemistry and Chemical Engineering, South China University of  
Technology, Guangzhou 510640, China.

\* Corresponding author. Email: liyw@scut.edu.cn

#### **This PDF file includes:**

Tables S1, S2

Figs. S1 to S12

**Table S1.** Crystallographic data for ZIF-67, ZIF-8, and Co-MOF-71.

| Item                | ZIF-67                                               | ZIF-8                                                | Co-MOF-71                                            |
|---------------------|------------------------------------------------------|------------------------------------------------------|------------------------------------------------------|
| Identification code | Co(MeIM) <sub>2</sub>                                | Zn(MeIM) <sub>2</sub>                                | Co(BDC)                                              |
| Empirical formula   | C <sub>8</sub> H <sub>10</sub> CoN <sub>4</sub>      | C <sub>8</sub> H <sub>10</sub> ZnN <sub>4</sub>      | C <sub>8</sub> H <sub>4</sub> CoO <sub>4</sub>       |
| Formula weight      | 221.13                                               | 229.59                                               | 223.05                                               |
| Metal precursor     | Co(NO <sub>3</sub> ) <sub>2</sub> ·6H <sub>2</sub> O | Zn(NO <sub>3</sub> ) <sub>2</sub> ·6H <sub>2</sub> O | Co(NO <sub>3</sub> ) <sub>2</sub> ·6H <sub>2</sub> O |
| Organic linker      | MeIM                                                 | MeIM                                                 | 1,4-BDC                                              |
| Crystal system      | cubic                                                | cubic                                                | orthorhombic                                         |
| SBU <sup>a</sup>    |                                                      |                                                      |                                                      |

<sup>a</sup> SBU refers to secondary building units. SBU of Co-MOF-71 is reproduced from ref. S1.

**Table S2.** Characterization results of the materials.

| Sample    | C<br>content<br>(wt%) <sup>a</sup> | N<br>content<br>(wt%) <sup>a</sup> | H<br>content<br>(wt%) <sup>a</sup> | Co<br>content<br>(wt%) <sup>b</sup> |
|-----------|------------------------------------|------------------------------------|------------------------------------|-------------------------------------|
| 67-CN-600 | 78.7                               | 16.5                               | 1.3                                | -                                   |
| 67-CN-700 | 84.8                               | 10.9                               | 1.2                                | -                                   |
| 67-CN-800 | 92.2                               | 4.8                                | 0.7                                | -                                   |
| 67-CN-900 | 95.8                               | 2.1                                | 0.6                                | -                                   |
| 8-CN-600  | 79.6                               | 15.6                               | 2.0                                | -                                   |
| 71-C-600  | 95.6                               | 0.1                                | 1.2                                | -                                   |

<sup>a</sup> Measured by elemental analysis.

<sup>b</sup> Measured by AAS.

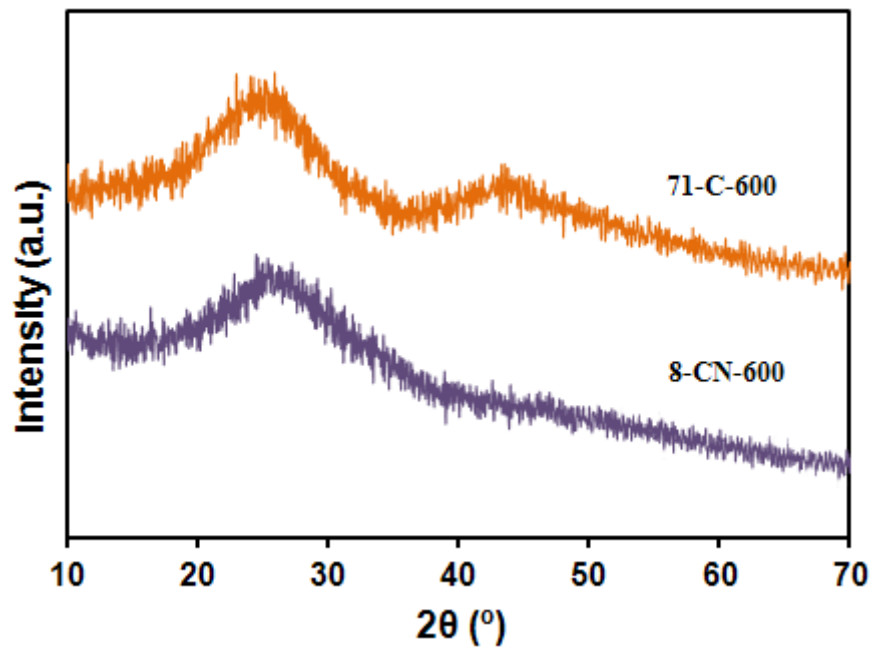

**Figure S1.** Powder XRD patterns of the porous N-doped carbons derived from Co-MOF-71 (up) and ZIF-8 (down).

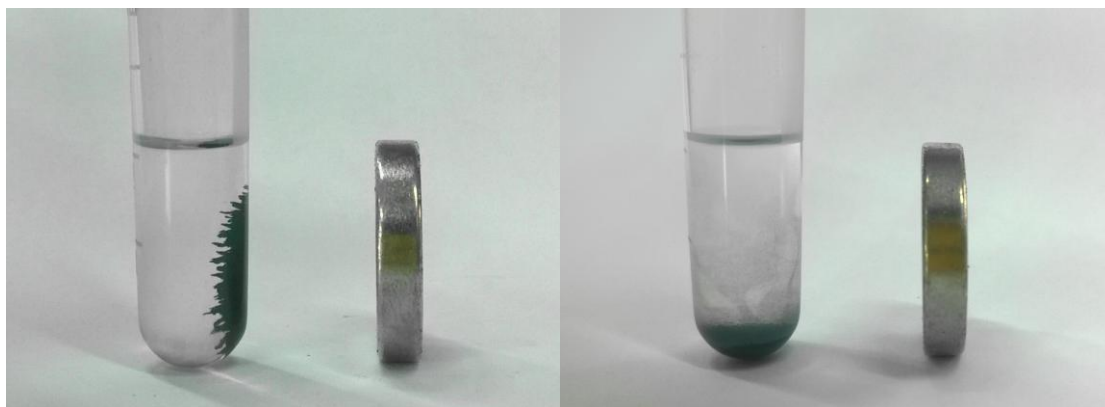

**Figure S2.** Photos of Co/CN-600 (left) and 67-CN-600 (right) in solution close to a magnet.

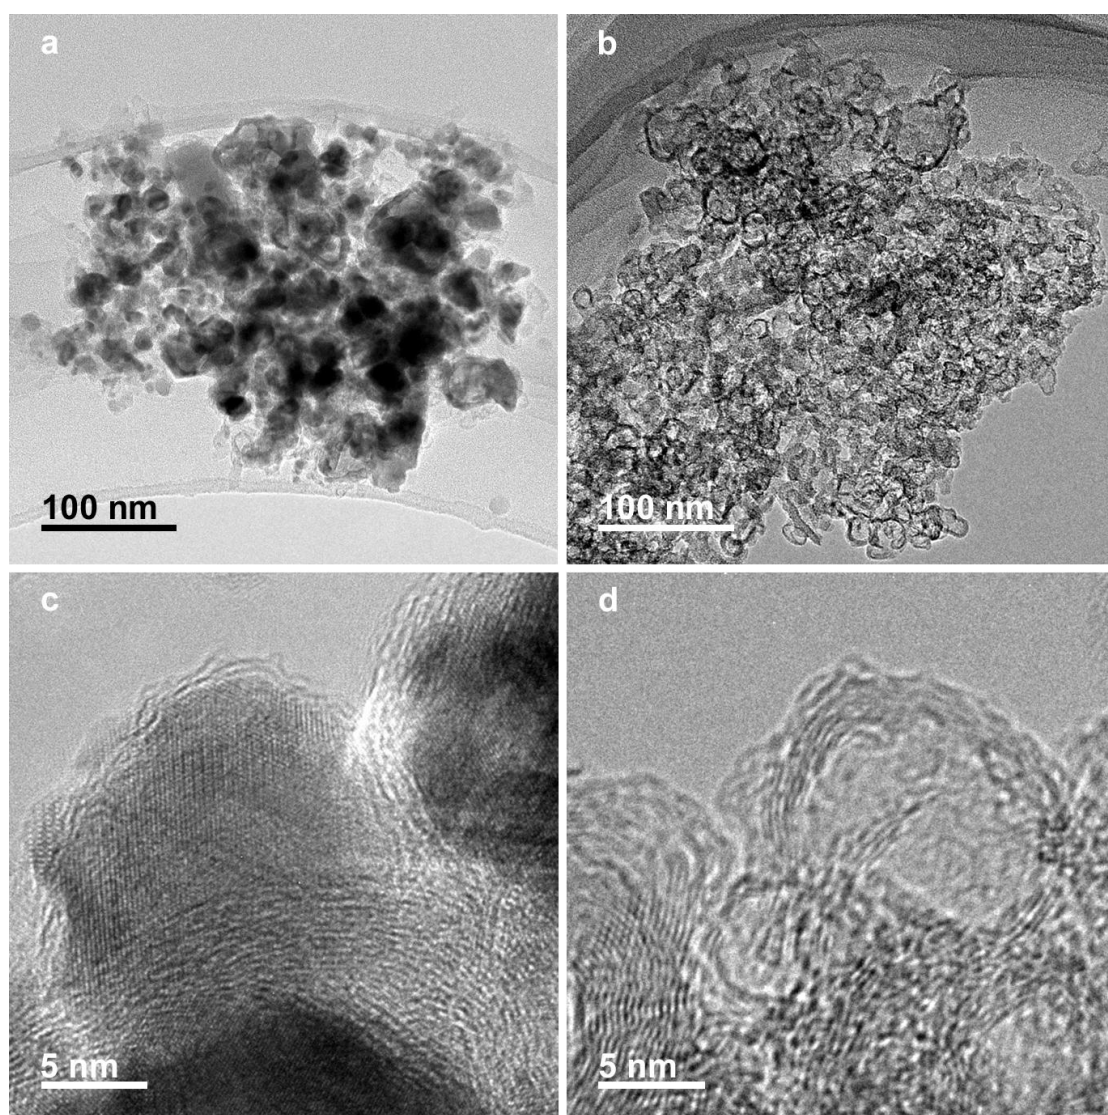

**Figure S3.** TEM images of Co/C-600 (a, c) and the obtained 71-C-600 (b, d) after chemical etching.

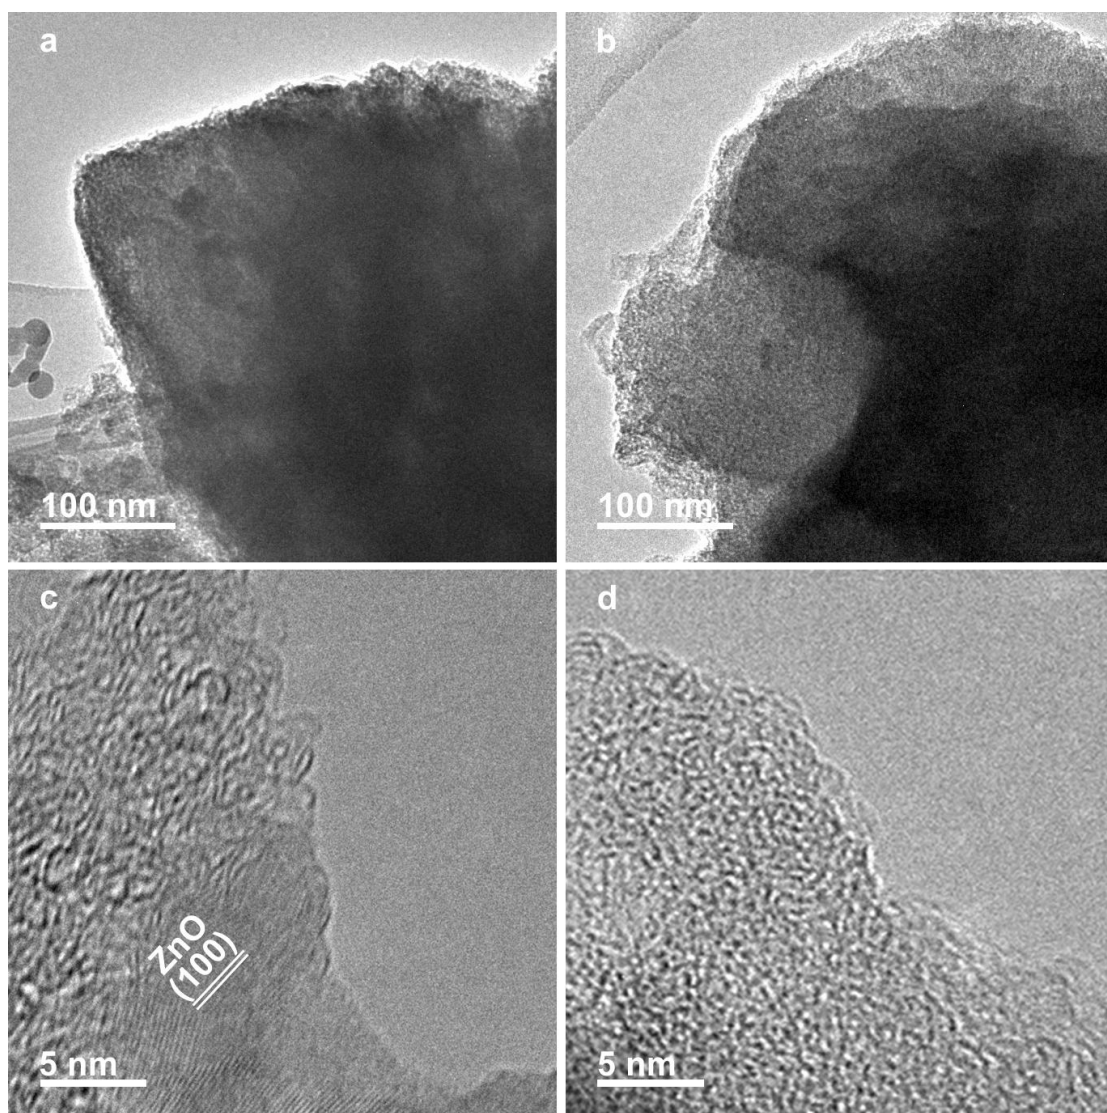

**Figure S4.** TEM images of ZnO/CN-600 (a, c) and the obtained 8-CN-600 (b, d) after chemical etching.

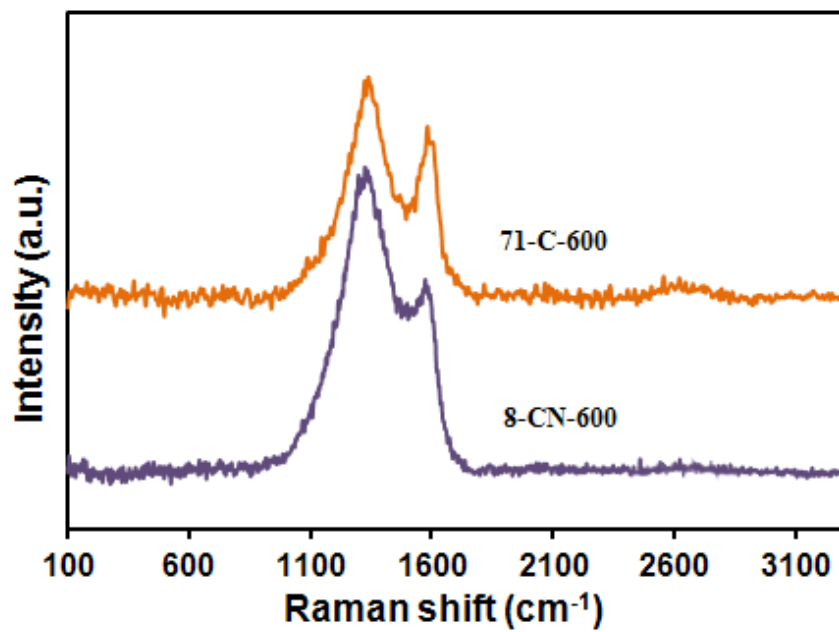

**Figure S5.** Raman spectra of the resultant porous N-doped carbons derived from Co-MOF-71 (up) and ZIF-8 (down).

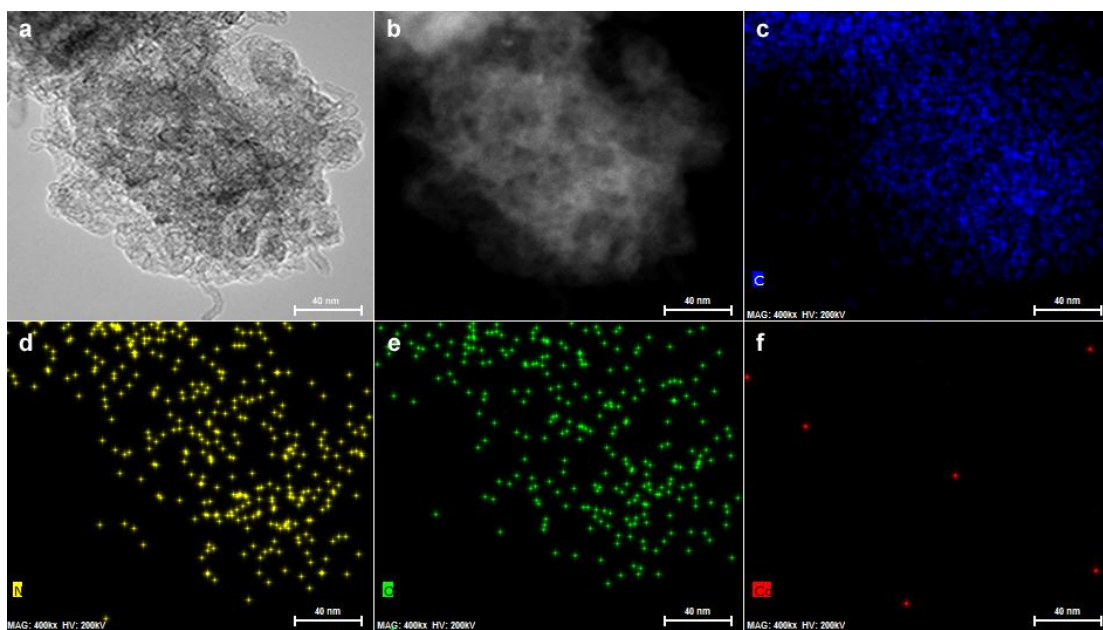

**Figure S6.** TEM image (a), HAADF-STEM image (b) of an individual 67-CN-600 particle and the corresponding elemental mappings of C (c), N (d), O (e) and Co (f), respectively.



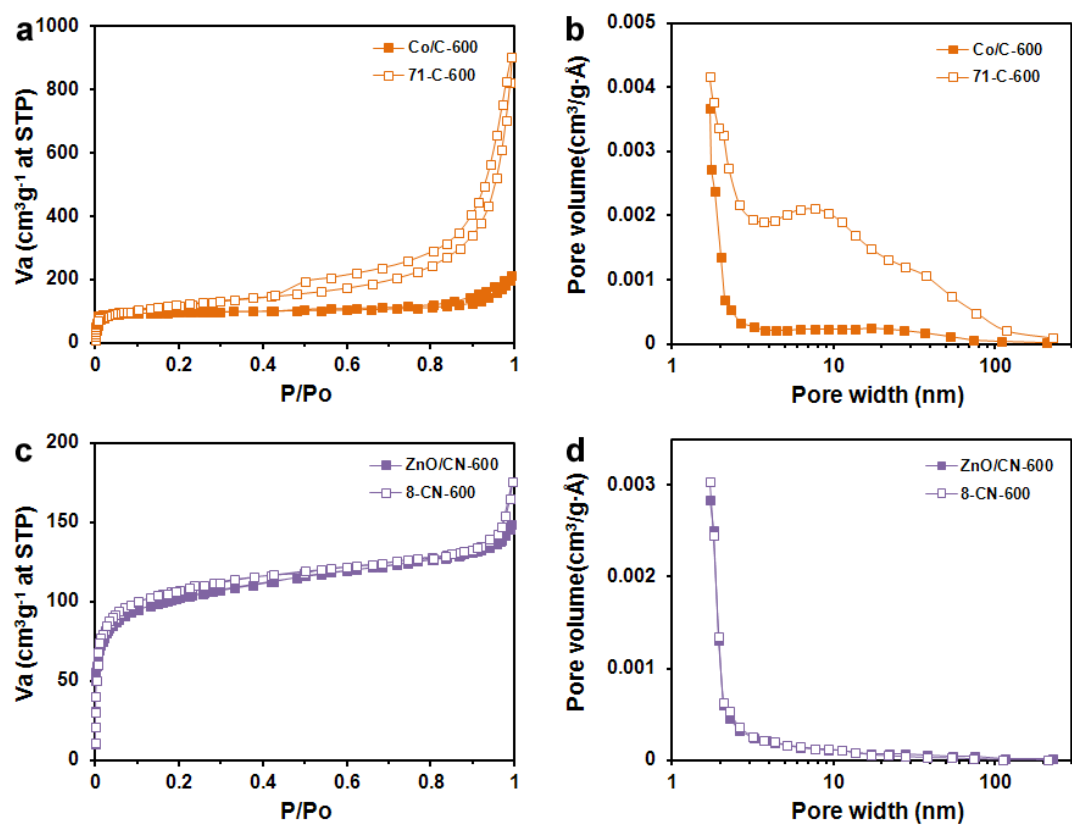

**Figure S7.** (a) N<sub>2</sub> adsorption/desorption isotherm at 77 K of Co/C-600 and 71-C-600. (b) Pore-size distribution of Co/C-600 and 71-C-600. (c) N<sub>2</sub> adsorption/desorption isotherm at 77 K of ZnO/CN-600 and 8-CN-600. (d) Pore-size distribution of ZnO/CN-600 and 8-CN-600.

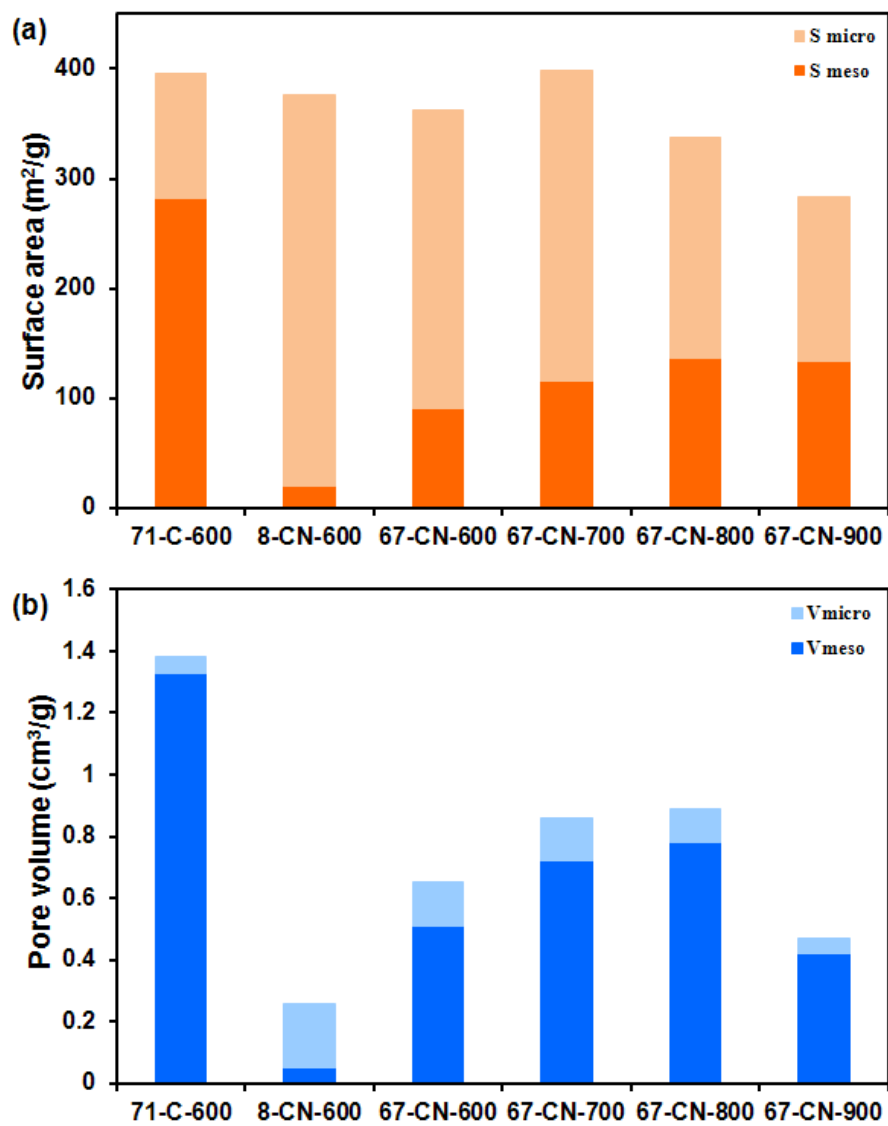

**Figure S8.** Surface areas (a) and pore volumes (b) of the carbon samples.

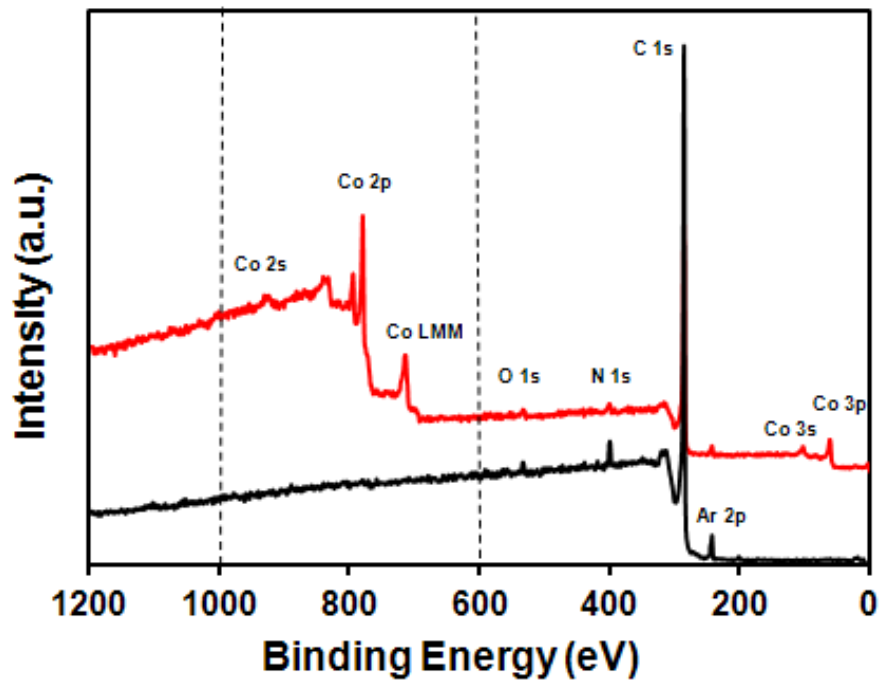

**Figure S9.** XPS survey spectra of Co/CN-600 (red) and 67-CN-600 (black).

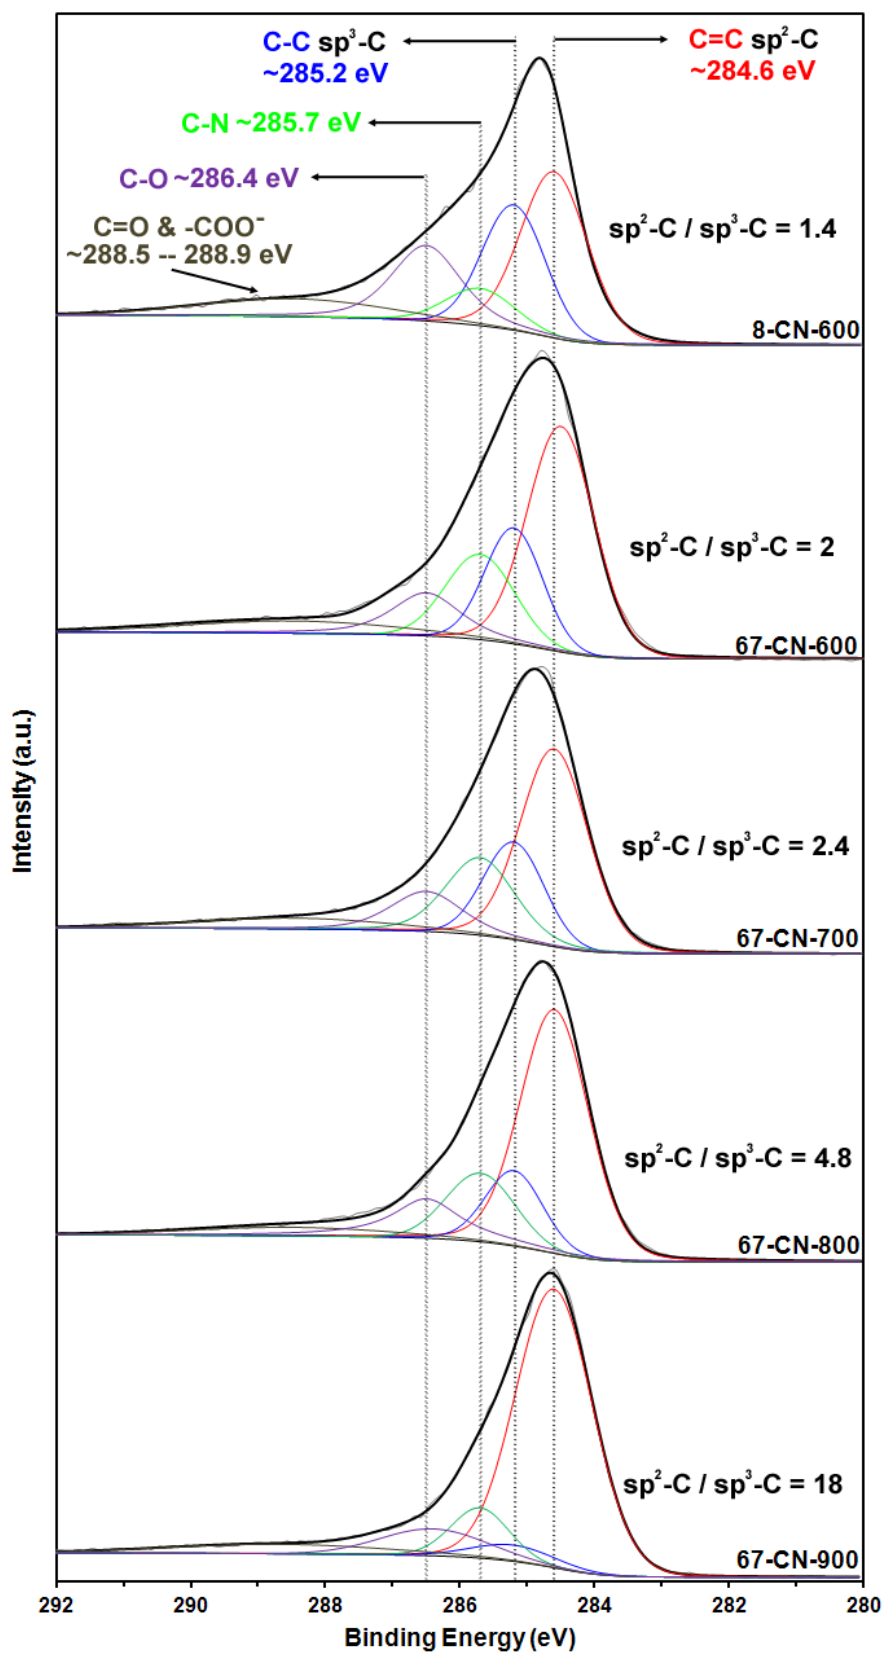

**Figure S10.** High-resolution C 1s XPS spectra of the 8-CN-600 and 67-CN-X samples.

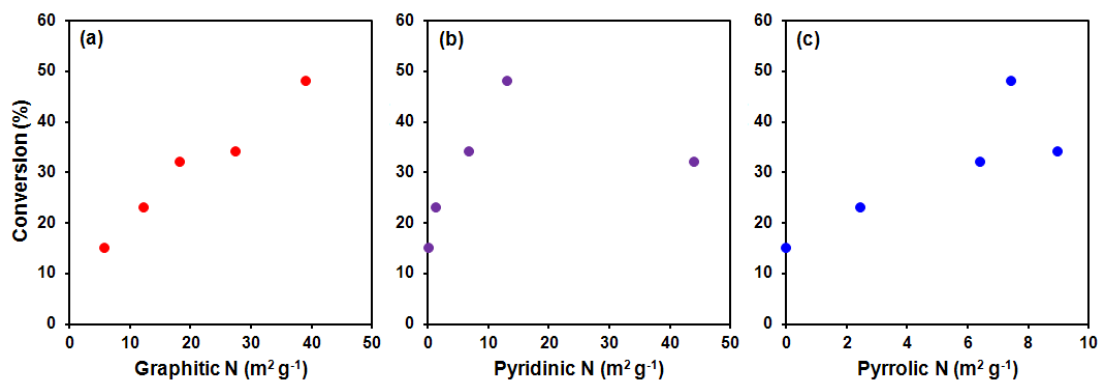

**Figure S11.** Plots of conversion in oxidation of cyclohexane against the amount of graphitic (a), pyridinic (b), and pyrrolic (c) nitrogen species on the nitrogen-doped carbon catalysts listed in Table 2 (entries 4-8).

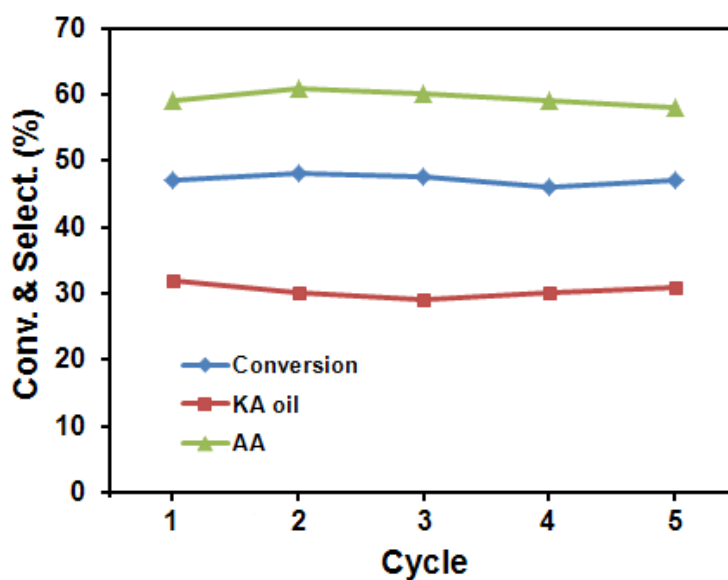

**Figure S12.** The reusability of 67-CN-600 in the cyclohexane oxidation.

## Reference

S1. N. L. Rosi, J. Kim, M. Eddaoudi, B. Chen, M. O'Keeffe and O. M. Yaghi, *J. Am. Chem. Soc.*, 2005, **127**, 1504-1518.
